# Supplementary material for: Enzymeless multi-sugar fuel cells with high power output based on 3D graphene–Co3O4 hybrid electrodes
Source: Royal Society of Chemistry journal article supplement (doi:10.1039/c3cp51410b), 2013-01-01
Supplement: c3cp51410b.pdf [file c3cp51410b.pdf]

## Supporting information

Enzymeless multi-sugar fuel cells with high power output based  
on 3D graphene-Co<sub>3</sub>O<sub>4</sub> hybrid electrodes

**Yun Chen, Kenath Priyanka Prasad, Xuewan Wang, Hongchang Pang, Ruyu  
Yan, Aung Than, Mary B. Chan-Park, Peng Chen\***

*Division of Bioengineering, School of Chemical and Biomedical Engineering, Nanyang  
Technological University, 70 Nanyang Drive, 637457, Singapore. Fax: +65 67911761; Tel: +65  
65141086 \*E-mail: [chenpeng@ntu.edu.sg](mailto:chenpeng@ntu.edu.sg)*

## 1. Deposition of $\text{Co}_3\text{O}_4$ onto 3D graphene with different electrochemical deposition duration

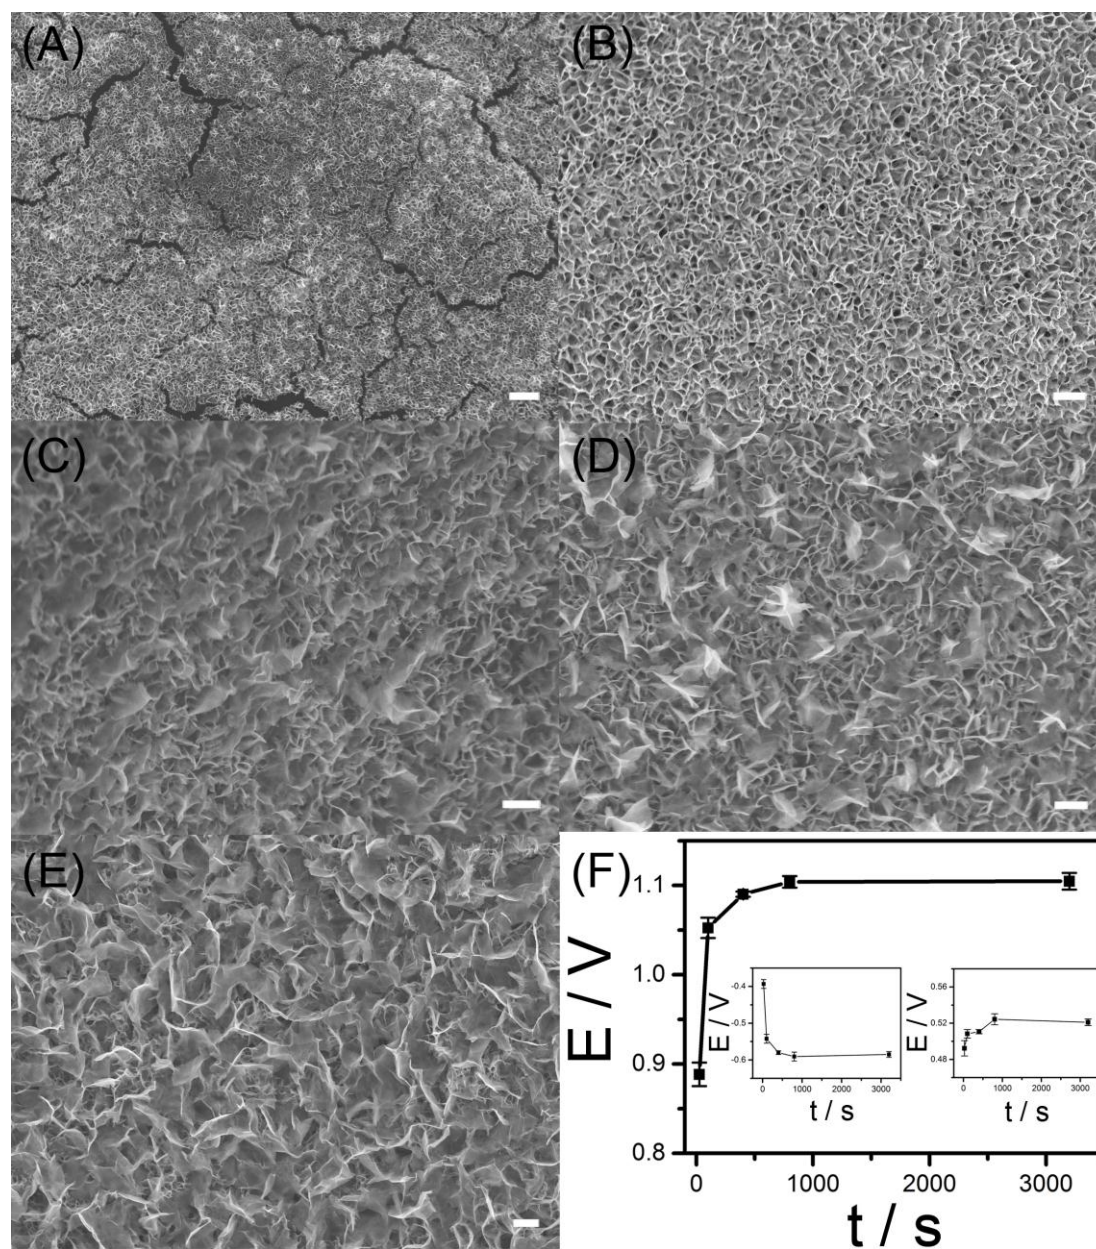

**Fig. S1.** (A – E) FESEM images of  $\text{Co}_3\text{O}_4$  electrochemically deposited on 3D graphene with various deposition durations: 25 s (A), 100 s (B), 400 s (C), 800 s (D), 3200 s (E). Scale bars = 1  $\mu\text{m}$ . (F) The open circuit voltage of a fuel cell with 3D graphene- $\text{Co}_3\text{O}_4$  anode and cathode (the different between anode and cathode). The time axis indicates the duration of electrochemical deposition of  $\text{Co}_3\text{O}_4$  onto the electrode. The left inset shows the corresponding open circuit potential of 3D graphene- $\text{Co}_3\text{O}_4$  anode with varying  $\text{Co}_3\text{O}_4$  coating measured in pH 5.0 buffer saturated with nitrogen and containing 200 mM glucose. The right inset shows the corresponding open circuit potential of 3D graphene- $\text{Co}_3\text{O}_4$  cathode with varying  $\text{Co}_3\text{O}_4$  coating measured in pH 5.0 buffer saturated with oxygen. Each data point is the average obtained from three independent measurements and the error bar indicates the standard deviation.

## 2. XRD characterization of 3D graphene-CoOOH and 3D graphene-Co(OH)<sub>2</sub>

With Cobalt(III) acetylacetonate solution containing 0.1 M NaNO<sub>3</sub> as the electrolyte, Cobalt(III) was electrochemically deposited onto 3D graphene by applying a constant potential of -1.0 V (vs. Ag/AgCl reference electrode) for 800s. After thorough rinsing with DI-water, the hybrid was annealed at 400 °C for 4 h to obtain 3D graphene-CoOOH. The XRD pattern shown in Fig. S2A displays three diffraction peaks at  $2\theta = 28.3^\circ$ ,  $36.7^\circ$ , and  $44.8^\circ$  resulting from the (110), (120), and (130) reflections of CoOOH, respectively (JCPDS 26-0480). 3D graphene-Co(OH)<sub>2</sub> was synthesized as described in the main text. Its XRD pattern (Fig. S2B) exhibits four diffraction peaks at  $2\theta = 18.8^\circ$ ,  $37.6^\circ$ ,  $51.0^\circ$  and  $61.3^\circ$  ascribed to the (001), (101), (102) and (111) reflections of Co(OH)<sub>2</sub>, respectively (JCPDS 30-0443).

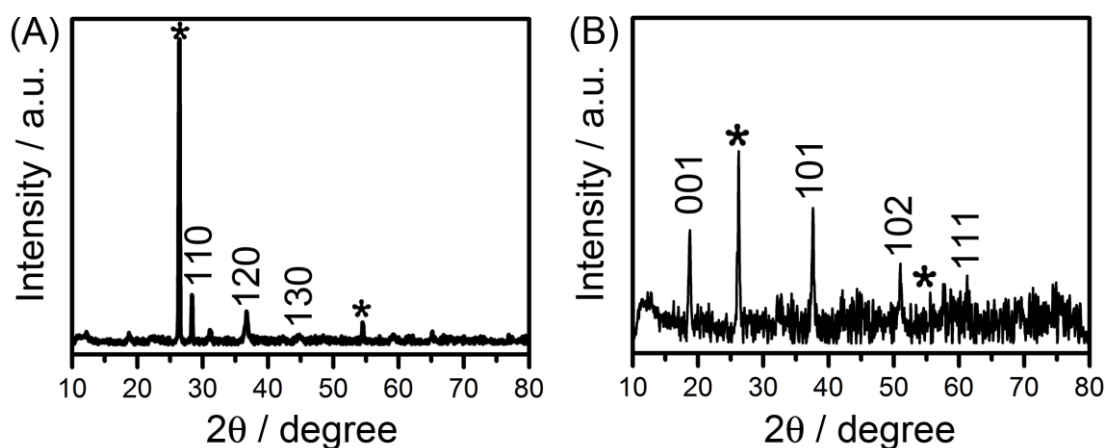

**Fig. S2.** XRD patterns of 3D graphene-CoOOH (A) and 3D graphene-Co(OH)<sub>2</sub> (B). \* marks the signal from 3D graphene.

## 3. The open circuit potentials of 3D graphene-CoOOH hybrid and 3D graphene-Co(OH)<sub>2</sub> hybrid to glucose and O<sub>2</sub>

As shown in Fig. S3, the graphene-CoOOH electrode (containing only Co<sup>III</sup>) gave a significant open circuit potential ( $E_a^{\text{ocp}} = -0.587 \pm 0.049$  V,  $n = 3$ ) in the presence of glucose and a small  $E_c^{\text{ocp}}$  ( $0.047 \pm 0.017$  V,  $n=3$ ) in the presence of oxygen. Conversely, the graphene-Co(OH)<sub>2</sub> electrode (containing only Co<sup>II</sup>) gave a negligible  $E_a^{\text{ocp}}$  ( $0.018 \pm 0.002$  V,  $n=3$ ) in the presence of glucose and a large  $E_c^{\text{ocp}}$  ( $0.543 \pm 0.020$  V,  $n=3$ ) in the presence of oxygen. These experiments confirm the oxidation ability of Co<sup>III</sup> and reduction ability of Co<sup>II</sup>.

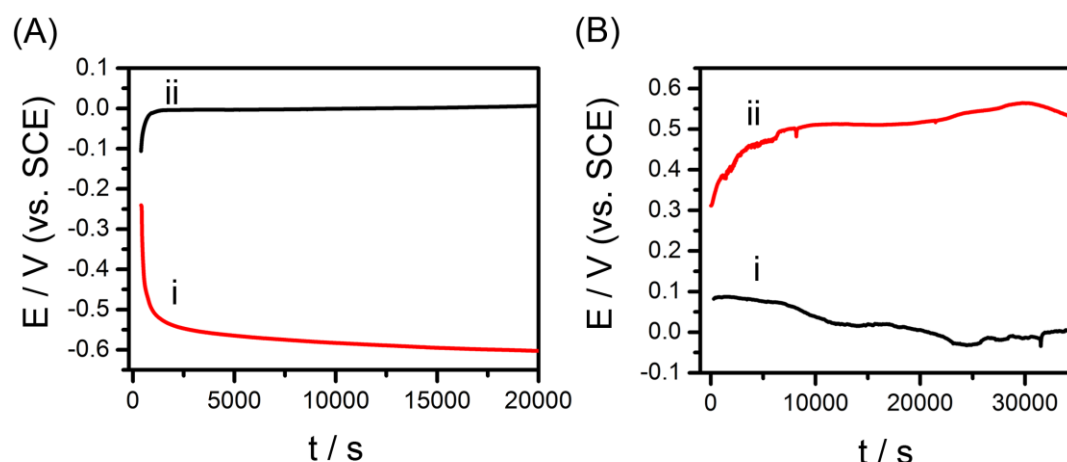

**Fig. S3.** The open circuit potential of a 3D graphene-CoOOH hybrid (A) and a 3D graphene-Co(OH)<sub>2</sub> hybrid (B) in pH 5.0 electrolyte solution which contained either 200 mM glucose and saturated nitrogen (i) or saturated oxygen (ii).

#### 4. The continuous performance of the fuel cell

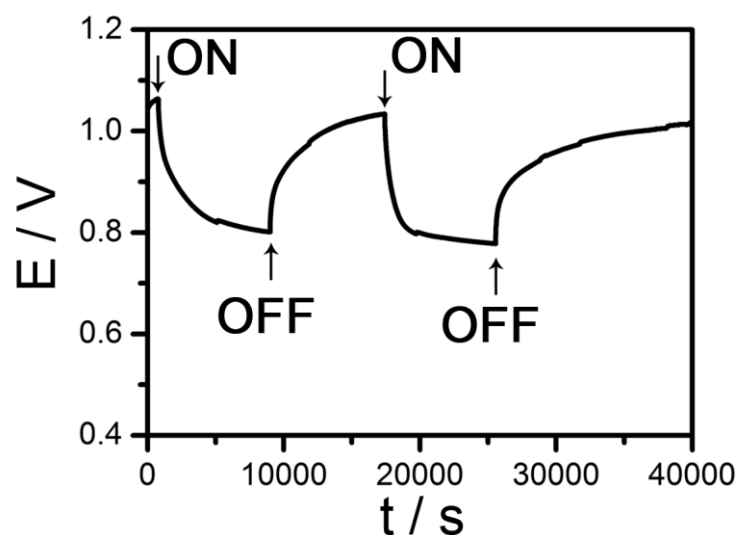

**Fig. S4.** The continuous voltage output of a fuel cell with a 100 kohm load and 200 mM glucose. "ON" and "OFF" indicate when the circuit is turned on or turned off, respectively.

#### 5. The cytotoxicity assay of 3D Graphene-Co<sub>3</sub>O<sub>4</sub> to PC12 cells

PC12 cells (American Type Culture Collection, USA) were cultured in Dulbecco's modified Eagle's medium (Gibco, USA) supplemented with 10% (v/v) fetal bovine serum (Gibco) and 1% penicillin–streptomycin at 37 °C under a humidified atmosphere containing 5% CO<sub>2</sub> and 95% air. The viability of the cells were determined using a MTT (3-(4,5-dimethylthiazol-2-yl)-2,5-diphenyl tetrasodium bromide)-based cell growth determination kit (Sigma-Aldrich, USA). Briefly, after washing with phosphate buffer saline (PBS), the cells were incubated in the culture medium containing MTT reagent solution (5 mg/ml MTT in RPMI-1640 without phenol red) (10% v/v) for 4 h at 37 °C. MTT solvent (0.1 N HCl in anhydrous isopropanol) was then added to the culturing well (50% v/v), followed by measuring the absorbance of MTT formazan crystals at 570 nm using

a Victor3 plate reader (PerkinElmer Inc., USA). With a bare 3D graphene electrode or a 3D graphene- $\text{Co}_3\text{O}_4$  hybrid electrode immersed in the culture medium for 2 days, the proliferation and viability of the cells were determined by optical observation and MTT assay in comparison with the control cells. As shown in Fig. S4, 3D graphene- $\text{Co}_3\text{O}_4$  hybrid electrode did not cause obvious cytotoxicity to PC12 cells.

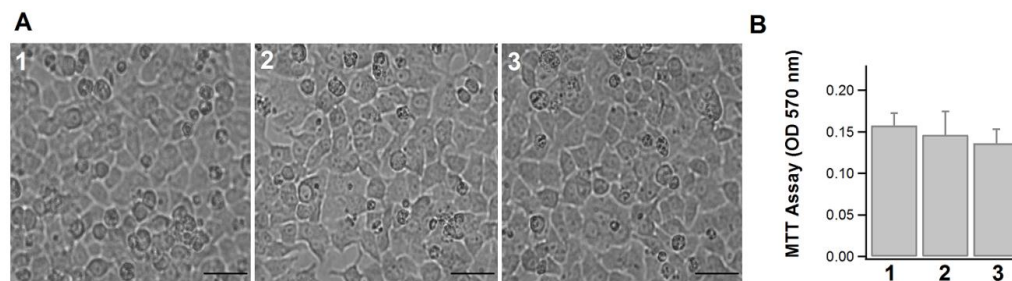

**Fig. S5.** (A) Optical images of PC12 cells cultured without (1), or with a bare 3D graphene electrode (2) or a 3D graphene- $\text{Co}_3\text{O}_4$  hybrid electrode (3). Scale bars = 20  $\mu\text{m}$ . (B) MTT assay of cell viability. Optical density (OD) at 570 nm was measured as the indicator of cell viability. The error bars are standard deviations ( $n = 4$  samples).
